# Supplementary material
Source: PubMed Central journal article supplement (PMC2678635)
Supplement: 0901808106_0901808106SI.pdf [file 0901808106_0901808106SI.pdf]

# Supporting Information

Wolf et al. 10.1073/pnas.0901808106

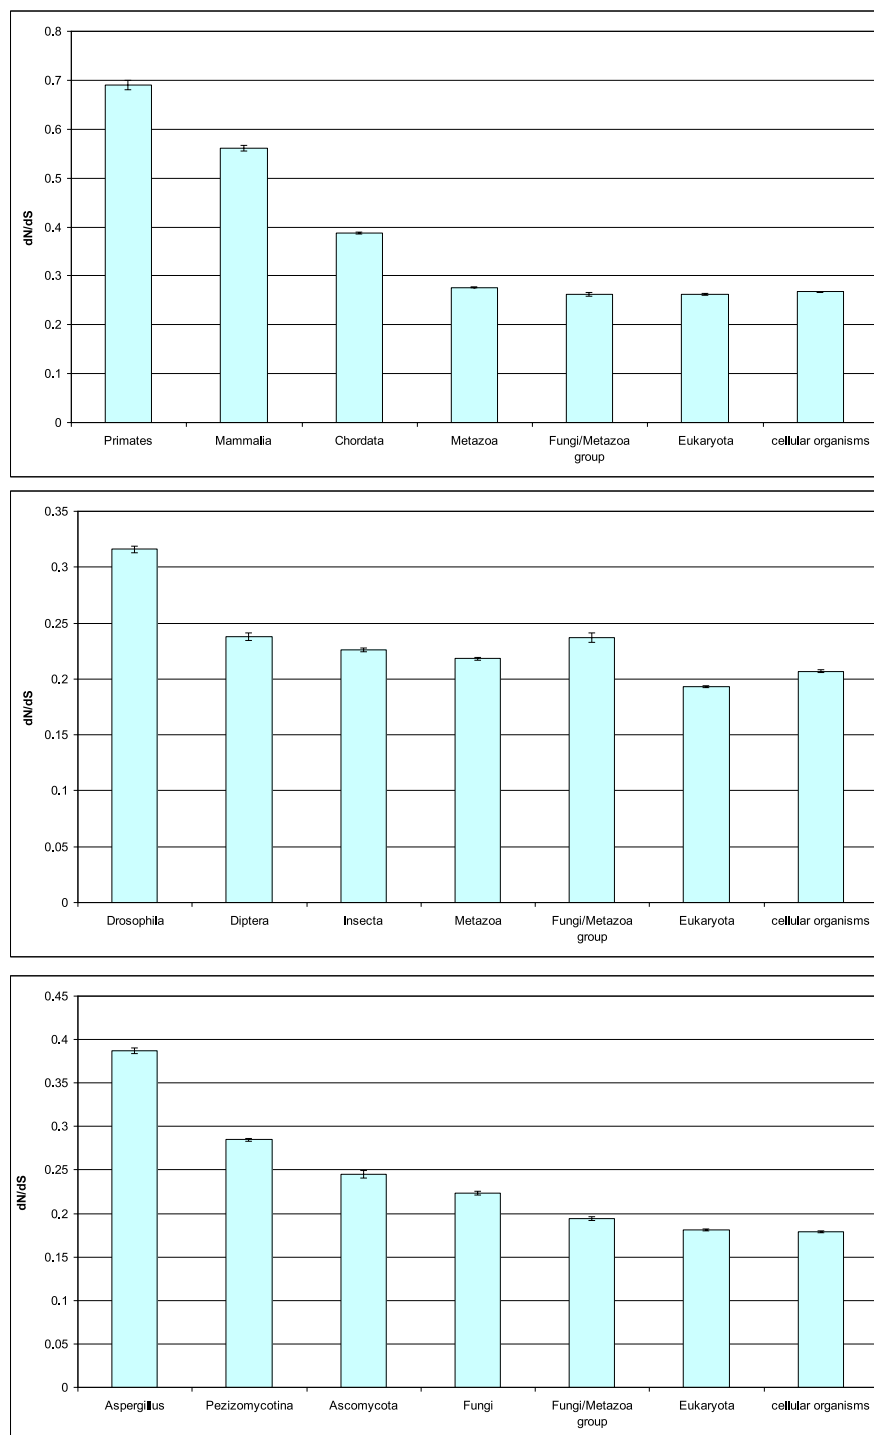

Fig. S1.  $dN/dS$  values (a measure of selection pressure) for concatenated alignments of different age classes of eukaryotic genes. (Top) *H. sapiens* (vs. *M. mulatta*). (Middle) *D. melanogaster* (vs. *D. simulans*). (Bottom) *A. fumigatus* (vs. *N. fischeri*).



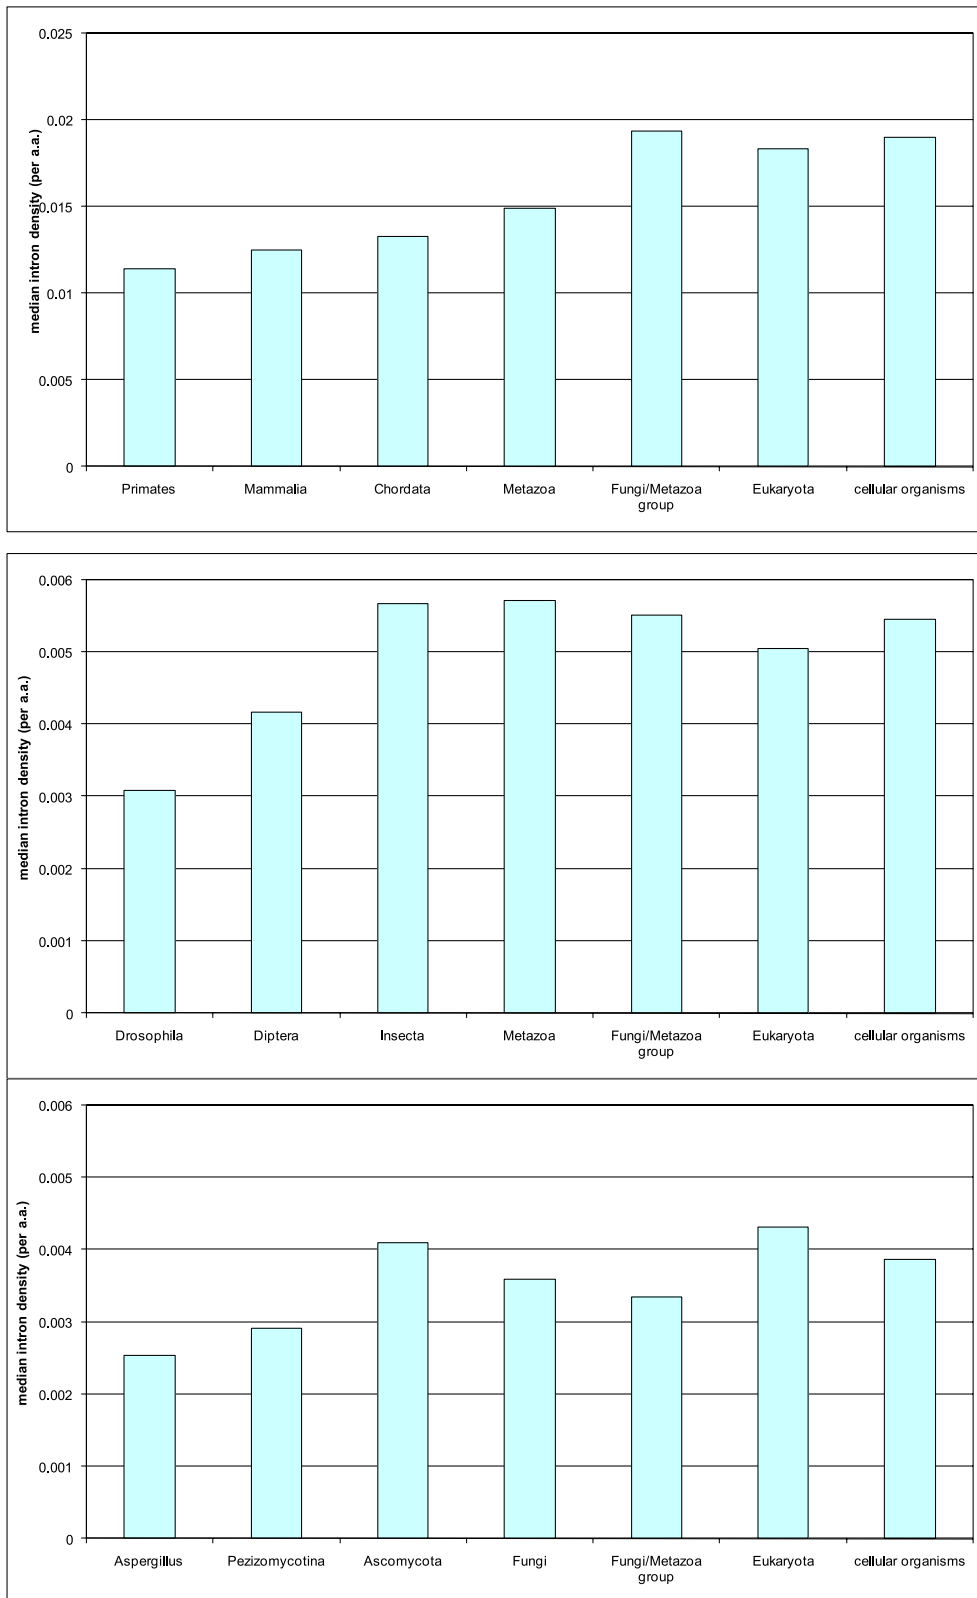

Fig. S3. Median intron densities of genes from different age classes. (Top) *H. sapiens*. (Middle) *D. melanogaster*. (Bottom) *A. fumigatus*.

## Other Supporting Information Files

[Dataset S1](#)

[Dataset S2](#)

[SI Appendix](#)
