# Supplementary material
Source: PubMed Central journal article supplement (PMC2678635)
Supplement: 0901808106_Appendix_PDF.pdf [file 0901808106_Appendix_PDF.pdf]

## SI Appendix

### Thresholds for the Delineation of the Gene Age Classes

To determine the thresholds for the number of hits required to assign a protein to a particular age class all BLAST hits from a genome to the RefSeq database were analyzed in the following way. A distribution of the number of hits to different organisms was constructed for each category; the location of the rightmost peak of the distribution (rounded to an integer) was considered to be the “effective number of genomes” in a taxonomic category (e.g. see Figure A1).

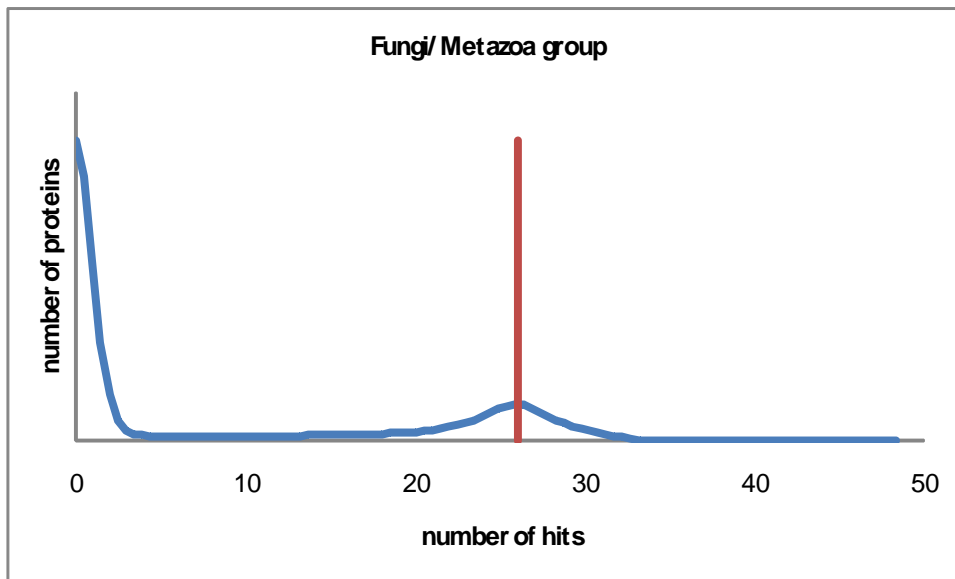

**Figure A1.** Distribution of the number of hits from AspFu proteins to the Fungi/Metazoa group organisms in RefSeq database. Red bar shows the “effective number of genomes” in the Fungi/Metazoa group (26) from the AspFu perspective.

The threshold for the number of hits required to assign a protein to the given age class was determined as a fraction of the effective number of genomes (Table A1).

**Table A1.**

| Taxonomic Class             | Effective No. of Genomes | Threshold No. of Hits |
|-----------------------------|--------------------------|-----------------------|
| Homsa - Primates            | 2                        | 1                     |
| Homsa - Mammalia            | 7                        | 3                     |
| Homsa - Chordata            | 4                        | 2                     |
| Homsa - Metazoa             | 13                       | 6                     |
| Homsa - Fungi/Metazoa group | 38                       | 19                    |
| Homsa - Eukaryota           | 10                       | 5                     |
| Homsa – cellular organisms  | 20                       | 10                    |
| Drome - Drosophila          | 1                        | 1                     |
| Drome - Diptera             | 3                        | 1                     |
| Drome - Insecta             | 3                        | 1                     |
| Drome - Metazoa             | 18                       | 9                     |
| Drome - Fungi/Metazoa group | 36                       | 18                    |
| Drome - Eukaryota           | 10                       | 5                     |
| Drome – cellular organisms  | 20                       | 10                    |
| Aspfu - Aspergillus         | 3                        | 1                     |
| Aspfu - Pezizomycotina      | 10                       | 5                     |
| Aspfu - Ascomycota          | 12                       | 6                     |
| Aspfu - Fungi               | 4                        | 2                     |
| Aspfu - Fungi/Metazoa group | 26                       | 13                    |
| Aspfu - Eukaryota           | 10                       | 5                     |
| Aspfu – cellular organisms  | 20                       | 10                    |

## SI Text

### Steady-State Model of Gene Gain and Loss

Consider a genome of a constant size under a steady-state process of gene acquisition and loss. Let  $l(t, a, x)$  be the number of genes of the age  $a$  having the loss rate  $x$  in a genome at time  $t$ . Then

$$\partial l / \partial t + \partial l / \partial a = -xl, \quad (1)$$

The density function  $l(t, a, x)$  should satisfy the boundary and initial conditions:

$$l(t, 0, x) = Cg(x), \quad (2)$$

$$l(0, a, x) = \varphi(a, x). \quad (3)$$

The condition (2) means that new genes (of age zero and the loss rate  $x$ ) appear with the rate that does not depend on time, and the total number of newly acquired genes is equal to some constant  $C$ .

We suppose also that the continuity condition is satisfied (see equation (7) below).

**Proposition.** The solution of model (1)-(3) is given by the formulas

$$l(t, a, x) = Ce^{-ax} g(x) \text{ at } t > a$$

and

$$l(t, a, x) = e^{-tx} \varphi(a - t, x) \text{ at } t < a.$$

**Proof.** The general solution of (1) is an arbitrary function of the first independent integrals of the system of ordinary differential equations

$$\frac{dl}{xl} = dt = da.$$

These integrals are  $I_1 = t - a$ ,  $I_2 = 2 \ln l + (t + a)x$ .

So, the general solution of equation (1) is of the form

$$l(t, a, x) = e^{-x(t+a)/2} F(t-a, x) \quad (4)$$

where  $F(t, x)$  is an arbitrary (differentiable) function.

$$\text{Then } l(t, 0, x) = e^{-tx/2} F(t, x) = Cg(x),$$

and we should take  $F(t, x) = Ce^{tx/2} g(x)$  at  $t > 0$

to satisfy the boundary condition (2).

$$\text{Next, } l(0, a, x) = e^{-ax/2} F(-a, x) = \varphi(a, x)$$

and we should take  $F(-a, x) = e^{ax} \varphi(a, x)$  at  $a > 0$

to satisfy the initial condition (3).

Hence, the solution of system (1)-(3) is

$$l(t, a, x) = e^{-(t+a)x/2} F(t-a, x) = Ce^{-ax} g(x) \text{ at } t > a \quad (5)$$

and

$$l(t, a, x) = e^{-(t+a)x/2} F(t-a, x) = e^{-tx} \varphi(a-t, x) \text{ at } t < a \quad (6).$$

To provide the continuity of the solution, we suppose that

$$\varphi(0, x) = Cg(x). \quad (7)$$

### Corollaries

1. The density  $l(t, a, x)$  does not depend on  $t$  at  $t > a$ .

2. The total size of a genome at  $t > a$  is  $L = \int_0^\infty \int_0^\infty l(t, a, x) da dx = C \int_0^\infty \frac{g(x)}{x} dx$ .

3. The distribution of genes in a genome over loss rate

$$f(x) = \int_0^\infty l(t, a, x) da / L = \frac{g(x)}{x} / \int_0^\infty \frac{g(x)}{x} dx \text{ at } t > a$$

and the distribution of genes being lost at any given moment  $t > a$  is

$$xf(x) = g(x)$$

(i.e. genes being lost have the same distribution of loss rate as genes being gained; effectively a condition of an equilibrium).

4. The distribution of genes in a genome over age

$$p(a) = \int_0^{\infty} l(t, a, x) dx / L = \int e^{-ax} g(x) dx / \int_0^{\infty} \frac{g(x)}{x} dx \text{ at } t > a$$

is proportional to the Laplace transform of  $g(x)$ .

It follows that, if the age distribution of genes in a genome  $p(a)$  is known, then we can reconstruct the distribution  $g(x)$  in the gene universe, and conversely. In practice, however, the data on  $p(a)$  obtained in the present study are too crude to attempt a meaningful reconstruction of  $g(x)$ .

### **Example.**

If  $g(x)$  (the distribution of the loss rate among the genes of zero age) is a gamma-distribution with the shape parameter  $\alpha > 1$ , then  $f(x)$  (the distribution of the loss rate across the whole genome) is also a gamma-distribution with the shape parameter  $\alpha - 1$  (Figure A2) and the distribution of gene ages is a Pareto distribution with a power-law tail with an exponent of  $-\alpha$  (Figure A3). Distributions of the loss rate among the genes belonging to different age classes could be quite distinct in this case (Figure A4).

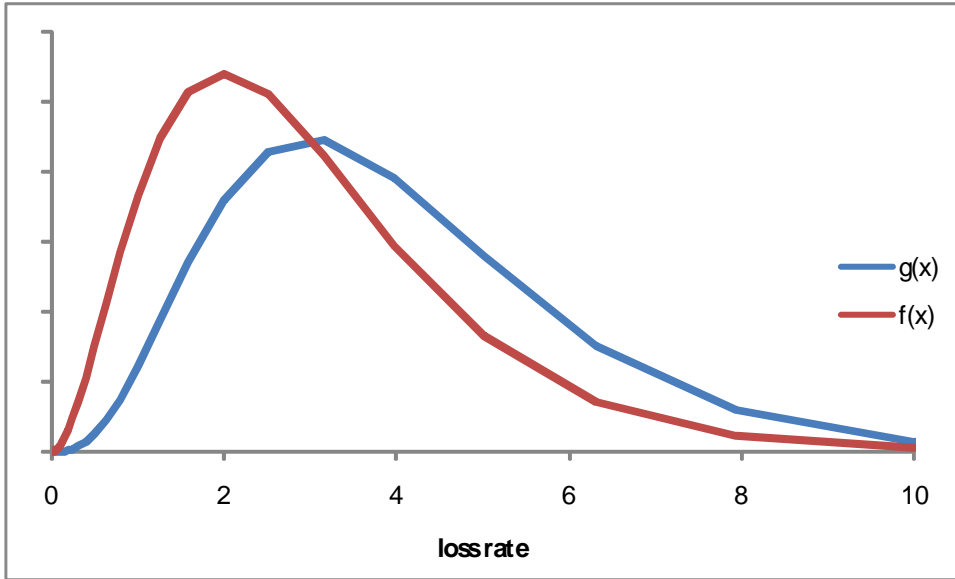

**Figure A2.** Distribution of the loss rate for the genes of zero age ( $g(x)$ ; a gamma-distribution with the shape parameter  $\alpha=4$ ) and the overall distribution of the gene loss rate in the genome.

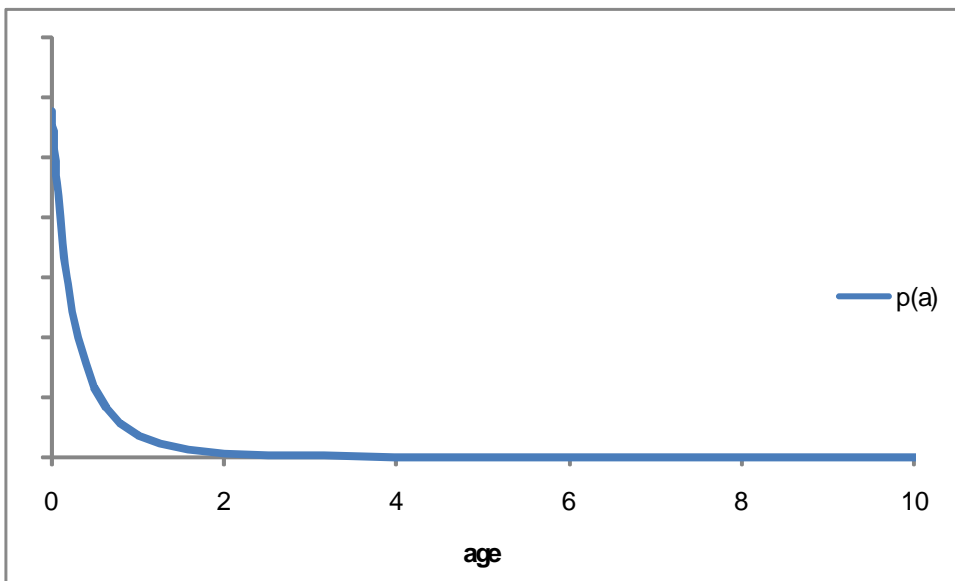

**Figure A3.** Distribution of the gene ages for the above model parameters.

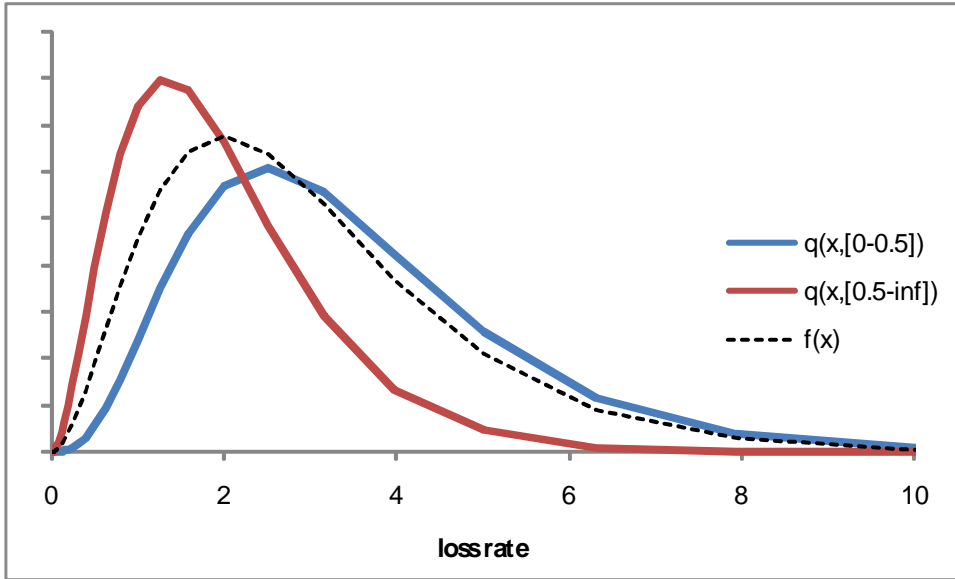

**Figure A4.** Distribution of the loss rate for the two age classes of genes: ages 0 to 0.5 and ages 0.5 to infinity.
